# Supplementary material for: Optimization of Light Intensity and NaNO3 Concentration in Amazon Cyanobacteria Cultivation to Produce Biodiesel
Source: MDPI journal article supplement (doi:10.3390/molecules24122326), 2019-06-24
Supplement: s1 [file s1]

**Table S1** Analysis of variance (ANOVA) for the biomass productivity response variable (mg/L/day) of *Synechocystis* sp. CACIAM05, at the 95% confidence level.

| Variable                      | DF            | Adj SS  | Adj MS  | F-Value | P-Value      |
|-------------------------------|---------------|---------|---------|---------|--------------|
| <b>Model</b>                  | 4             | 246.492 | 61.623  | 103.11  | <b>0.010</b> |
| X <sub>1</sub>                | 1             | 140.186 | 140.186 | 234.57  | 0.004        |
| X <sub>2</sub>                | 1             | 94.868  | 94.868  | 158.74  | 0.006        |
| X <sub>1</sub> X <sub>2</sub> | 1             | 0.624   | 0.624   | 1.04    | 0.414        |
| <b>Curvature</b>              | 1             | 10.815  | 10.815  | 18.10   | <b>0.051</b> |
| Error                         | 2             | 1.195   | 0.598   |         |              |
| Total                         | 6             | 247.687 |         |         |              |
| <b>R<sup>2</sup></b>          | <b>0.9952</b> |         |         |         |              |

X<sub>1</sub>= light intensity, X<sub>2</sub>= nitrogen source, F= comparative statistical test in the assays to evaluate the quality of fit of the model.

**Table S2** Analysis of variance (ANOVA) for the biomass productivity response variable (mg/L/day) of *Microcystis aeruginosa* CACIAM08, at the 95% confidence level.

| Variable                      | DF | Adj SS  | Adj MS  | F-Value | P-Value      |
|-------------------------------|----|---------|---------|---------|--------------|
| <b>Model</b>                  | 4  | 80.6391 | 20.1598 | 88.52   | <b>0.011</b> |
| X <sub>1</sub>                | 1  | 13.5792 | 13.5792 | 59.63   | 0.016        |
| X <sub>2</sub>                | 1  | 6.8906  | 6.8906  | 30.26   | 0.031        |
| X <sub>1</sub> X <sub>2</sub> | 1  | 0.2756  | 0.2756  | 1.21    | 0.386        |
| <b>Curvature</b>              | 1  | 59.8936 | 59.8936 | 263.00  | <b>0.004</b> |
| Error                         | 2  | 0.4555  | 0.2277  |         |              |
| Total                         | 6  | 81.0946 |         |         |              |

X<sub>1</sub>= light intensity, X<sub>2</sub>= nitrogen source, F= comparative statistical test in the assays to evaluate the quality of fit of the model.

**Table S3** Analysis of variance (ANOVA) for the biomass productivity response variable (mg/L/day) of *Leptolyngbya* sp. CACIAM18, at the 95% confidence level.

| Variable                      | DF            | Adj SS  | Adj MS  | F-Value | P-Value      |
|-------------------------------|---------------|---------|---------|---------|--------------|
| <b>Model</b>                  | 4             | 257.585 | 64.396  | 661.83  | <b>0.002</b> |
| X <sub>1</sub>                | 1             | 146.531 | 146.531 | 1505.97 | 0.001        |
| X <sub>2</sub>                | 1             | 110.776 | 110.776 | 1138.50 | 0.001        |
| X <sub>1</sub> X <sub>2</sub> | 1             | 0.276   | 0.276   | 2.83    | 0.234        |
| <b>Curvature</b>              | 1             | 0.002   | 0.002   | 0.02    | <b>0.889</b> |
| Error                         | 2             | 0.195   | 0.097   |         |              |
| Total                         | 6             | 257.779 |         |         |              |
| <b>R<sup>2</sup></b>          | <b>0.9992</b> |         |         |         |              |

X<sub>1</sub>= light intensity, X<sub>2</sub>= nitrogen source, F= comparative statistical test in the assays to evaluate the quality of fit of the model.

**Table S4** Analysis of variance (ANOVA) for the biomass productivity response variable (mg/L/day) of *Limnothrix redekei* CACIAM25, at the 95% confidence level.

| Variable                      | DF | Adj SS  | Adj MS  | F-Value | P-Value      |
|-------------------------------|----|---------|---------|---------|--------------|
| <b>Model</b>                  | 4  | 584.565 | 146.141 | 161.07  | <b>0.006</b> |
| X <sub>1</sub>                | 1  | 173.054 | 173.054 | 190.74  | 0.005        |
| X <sub>2</sub>                | 1  | 266.179 | 266.179 | 293.38  | 0.003        |
| X <sub>1</sub> X <sub>2</sub> | 1  | 2.512   | 2.512   | 2.77    | 0.238        |
| <b>Curvature</b>              | 1  | 142.819 | 142.819 | 157.41  | <b>0.006</b> |
| Error                         | 2  | 1.815   | 0.907   |         |              |
| Total                         | 6  | 586.379 |         |         |              |

X<sub>1</sub>= light intensity, X<sub>2</sub>= nitrogen source, F= comparative statistical test in the assays to evaluate the quality of fit of the model.

**Table S5** Analysis of variance (ANOVA) for the lipid content response variable (%) of *Synechocystis* sp. CACIAM05, at the 95% confidence level.

| Variable                      | DF            | Adj SS  | Adj MS  | F-Value | P-Value      |
|-------------------------------|---------------|---------|---------|---------|--------------|
| <b>Model</b>                  | 4             | 61,0391 | 15,2598 | 49,38   | <b>0,020</b> |
| X <sub>1</sub>                | 1             | 21,5296 | 21,5296 | 69,67   | 0,014        |
| X <sub>2</sub>                | 1             | 4,0401  | 4,0401  | 13,07   | 0,069        |
| X <sub>1</sub> X <sub>2</sub> | 1             | 32,4900 | 32,4900 | 105,13  | 0,009        |
| <b>Curvature</b>              | 1             | 2,9794  | 2,9794  | 9,64    | <b>0,090</b> |
| Error                         | 2             | 0,6181  | 0,3090  |         |              |
| Total                         | 6             | 61,6572 |         |         |              |
| <b>R<sup>2</sup></b>          | <b>0,9900</b> |         |         |         |              |

X<sub>1</sub>= light intensity, X<sub>2</sub>= nitrogen source, F= comparative statistical test in the assays to evaluate the quality of fit of the model.

**Table S6** Analysis of variance (ANOVA) for the lipid content response variable (%) of *Microcystis aeruginosa* CACIAM08, at the 95% confidence level.

| Variable                      | DF | Adj SS  | Adj MS  | F-Value | P-Value      |
|-------------------------------|----|---------|---------|---------|--------------|
| <b>Model</b>                  | 4  | 761,661 | 190,415 | 305,09  | <b>0,003</b> |
| X <sub>1</sub>                | 1  | 55,577  | 55,577  | 89,05   | 0,011        |
| X <sub>2</sub>                | 1  | 582,981 | 582,981 | 934,06  | 0,001        |
| X <sub>1</sub> X <sub>2</sub> | 1  | 23,281  | 23,281  | 37,30   | 0,026        |
| <b>Curvature</b>              | 1  | 99,822  | 99,822  | 159,94  | <b>0,006</b> |
| Error                         | 2  | 1,248   | 0,624   |         |              |
| Total                         | 6  | 762,909 |         |         |              |

X<sub>1</sub>= light intensity, X<sub>2</sub>= nitrogen source, F= comparative statistical test in the assays to evaluate the quality of fit of the model.

**Table S7** Analysis of variance (ANOVA) for the lipid content response variable (%) of *Leptolyngbya* sp. CACIAM18, at the 95% confidence level.

| Variable                      | DF | Adj SS  | Adj MS  | F-Value | P-Value      |
|-------------------------------|----|---------|---------|---------|--------------|
| <b>Model</b>                  | 4  | 581,793 | 145,448 | 93,78   | <b>0,011</b> |
| X <sub>1</sub>                | 1  | 6,708   | 6,708   | 4,32    | 0,173        |
| X <sub>2</sub>                | 1  | 6,150   | 6,150   | 3,97    | 0,185        |
| X <sub>1</sub> X <sub>2</sub> | 1  | 217,562 | 217,562 | 140,27  | 0,007        |
| <b>Curvature</b>              | 1  | 351,372 | 351,372 | 226,54  | <b>0,004</b> |
| Error                         | 2  | 3,102   | 1,551   |         |              |
| Total                         | 6  | 584,895 |         |         |              |

X<sub>1</sub>= light intensity, X<sub>2</sub>= nitrogen source, F= comparative statistical test in the assays to evaluate the quality of fit of the model.

**Table S8** Analysis of variance (ANOVA) for the lipid content response variable (%) of *Limnothrix redekei* CACIAM25, at the 95% confidence level.

| Variable                      | DF | Adj SS  | Adj MS  | F-Value | P-Value      |
|-------------------------------|----|---------|---------|---------|--------------|
| <b>Model</b>                  | 4  | 2146,10 | 536,53  | 916,15  | <b>0,001</b> |
| X <sub>1</sub>                | 1  | 384,94  | 384,94  | 657,31  | 0,002        |
| X <sub>2</sub>                | 1  | 591,95  | 591,95  | 1010,78 | 0,001        |
| X <sub>1</sub> X <sub>2</sub> | 1  | 30,91   | 30,91   | 52,79   | 0,018        |
| <b>Curvature</b>              | 1  | 1138,30 | 1138,30 | 1943,70 | <b>0,001</b> |
| Error                         | 2  | 1,17    | 0,59    |         |              |
| Total                         | 6  | 2147,28 |         |         |              |

X<sub>1</sub>= light intensity, X<sub>2</sub>= nitrogen source, F= comparative statistical test in the assays to evaluate the quality of fit of the model.
