# Supplementary material for: Optimization of Light Intensity and NaNO3 Concentration in Amazon Cyanobacteria Cultivation to Produce Biodiesel
Source: MDPI journal article supplement (doi:10.3390/molecules24122326), 2019-06-24
Supplement: s1 [file s1]

**Table 1** Experimental matrix and results obtained from the experimental design 2<sup>2</sup> used to optimize the independent variables light intensity (X) and concentration of NaNO<sub>3</sub> (Y) in the culture medium.

| Assay | Variable |   |                   |     | Biomass productivity (mg/L/day) |      |      |      | Lipid content (%) |      |      |      | Lipid productivity (mg/L/day) |     |      |      |
|-------|----------|---|-------------------|-----|---------------------------------|------|------|------|-------------------|------|------|------|-------------------------------|-----|------|------|
|       |          |   |                   |     | CACIAM <sup>2</sup>             |      |      |      | CACIAM            |      |      |      | CACIAM                        |     |      |      |
|       | Coded    |   | Real <sup>1</sup> |     | 05                              | 08   | 18   | 25   | 05                | 08   | 18   | 25   | 05                            | 08  | 18   | 25   |
|       | X        | Y | X                 | Y   |                                 |      |      |      |                   |      |      |      |                               |     |      |      |
| 1     | -        | - | 15                | 1   | 26.8                            | 12.1 | 23.2 | 24.2 | 15.3              | 12.4 | 20.6 | 33.1 | 4.1                           | 3.8 | 4.8  | 3.4  |
| 2     | -        | + | 15                | 2   | 37.4                            | 15.3 | 33.2 | 42.1 | 18.9              | 31.7 | 32.9 | 14.4 | 7.1                           | 2.3 | 10.9 | 24.6 |
| 3     | +        | - | 100               | 1   | 39.5                            | 16.3 | 34.7 | 39.0 | 25.6              | 15.0 | 37.9 | 58.3 | 10.1                          | 7.2 | 13.2 | 11.1 |
| 4     | +        | + | 100               | 2   | 48.4                            | 18.4 | 45.8 | 53.7 | 17.9              | 44.0 | 20.7 | 28.4 | 8.7                           | 3.3 | 9.5  | 7.4  |
| 5     | 0        | 0 | 57.5              | 1.5 | 34.6                            | 9.5  | 34.2 | 30.5 | 18.1              | 18.1 | 13.7 | 7.8  | 6.3                           | 1.7 | 4.7  | 2.4  |
| 6     | 0        | 0 | 57.5              | 1.5 | 36.1                            | 10.2 | 34.0 | 29.7 | 18.7              | 18.9 | 14.9 | 8.5  | 6.7                           | 1.9 | 5.1  | 2.5  |
| 7     | 0        | 0 | 57.5              | 1.5 | 35.8                            | 9.2  | 34.6 | 31.6 | 17.6              | 17.3 | 12.4 | 7.0  | 6.3                           | 1.6 | 4.3  | 2.2  |

<sup>1</sup> X= Luminous intensity ( $\mu\text{mol}/\text{m}^2\text{s}$ ) and Y= NaNO<sub>3</sub> concentration (g/L)

<sup>2</sup> *Synechocystis* sp. CACIAM05, *Microcystis aeruginosa* CACIAM08, *Leptolyngbya* sp. CACIAM18 and *Limnothrix redekei* CACIAM25

**Table 21** Lipidic Fatty acid profile (%) extracted from cyanobacteria strains

| Strains                                                          | Fatty acid |       |       |       |       |       |       |       |       |       | SFA   | MUFA   | PUFA  |
|------------------------------------------------------------------|------------|-------|-------|-------|-------|-------|-------|-------|-------|-------|-------|--------|-------|
|                                                                  | C12:0      | C14:0 | C16:0 | C16:1 | C17:0 | C18:0 | C18:1 | C18:2 | C18:3 | C20:0 |       |        |       |
| <i>Synechocystis</i> sp. CACIAM05 NaNO <sub>3</sub> + / Light +  | 9.16       | 7.08  | 54.96 | -     | -     | 9.62  | -     | -     | -     | -     | 80.82 | 0.00   | 0.00  |
| <i>Synechocystis</i> sp. CACIAM05 NaNO <sub>3</sub> + / Light -  | -          | -     | 29.90 | 2.13  | 2.13  | -     | 42.65 | -     | -     | -     | 32.03 | 44.78  | 0.00  |
| <i>Synechocystis</i> sp. CACIAM05 NaNO <sub>3</sub> - / Light +  | -          | -     | 37.65 | 2.25  | 2.27  | -     | 28.15 | -     | -     | -     | 39.92 | 30.41  | 0.00  |
| <i>Synechocystis</i> sp. CACIAM05 NaNO <sub>3</sub> - / Light -  | -          | -     | 37.77 | 2.01  | 2.06  | -     | 20.55 | -     | -     | -     | 39.83 | 22.56  | 0.00  |
| <i>Synechocystis</i> sp. CACIAM05 NaNO <sub>3</sub> 0 / Light 0  | -          | -     | 60.52 | -     | -     | 2.62  | -     | 14.65 | 2.96  | -     | 63.14 | 0.00   | 17.61 |
| <i>M. aeruginosa</i> CACIAM08 NaNO <sub>3</sub> + / Light +      | -          | -     | 29.97 | -     | -     | 15.32 | 49.50 | -     | -     | 1.33  | 46.62 | 49.50  | 0.00  |
| <i>M. aeruginosa</i> CACIAM08 NaNO <sub>3</sub> + / Light -      | -          | -     | 25.71 | -     | 28.36 | -     | 43.90 | -     | -     | -     | 54.07 | 43.90  | 0.00  |
| <i>M. aeruginosa</i> CACIAM08 NaNO <sub>3</sub> - / Light +      | -          | -     | -     | -     | 23.77 | 5.69  | 5.81  | -     | -     | -     | 29.47 | 5.81   | 0.00  |
| <i>M. aeruginosa</i> CACIAM08 NaNO <sub>3</sub> - / Light -      | -          | 1.62  | 33.14 | -     | 11.25 | 11.20 | 15.42 | -     | -     | 1.39  | 58.61 | 15.42  | 0.00  |
| <i>M. aeruginosa</i> CACIAM08 NaNO <sub>3</sub> 0 / Light 0      | -          | -     | 31.18 | -     | 20.67 | 3.95  | 29.87 | -     | -     | -     | 55.80 | 29.87  | 0.00  |
| <i>Leptolyngbya</i> sp. CACIAM18 NaNO <sub>3</sub> + / Light +   | -          | 9.92  | 32.99 | 34.13 | -     | -     | 4.59  | -     | -     | -     | 42.92 | 38.72  | 0.00  |
| <i>Leptolyngbya</i> sp. CACIAM18 NaNO <sub>3</sub> + / Light -   | -          | 9.91  | 25.22 | 52.55 | -     | -     | -     | -     | -     | -     | 35.13 | 52.55  | 0.00  |
| <i>Leptolyngbya</i> sp. CACIAM18 NaNO <sub>3</sub> - / Light +   | -          | 18.58 | 29.66 | 23.79 | -     | -     | -     | -     | -     | -     | 48.23 | 23.79  | 0.00  |
| <i>Leptolyngbya</i> sp. CACIAM18 NaNO <sub>3</sub> - / Light -   | -          | 14.91 | 32.74 | 42.96 | -     | 2.42  | -     | -     | -     | -     | 50.06 | 42.957 | 0.00  |
| <i>Leptolyngbya</i> sp. CACIAM18 NaNO <sub>3</sub> 0 / Light 0   | -          | 18.10 | 29.86 | 25.51 | -     | -     | 7.79  | -     | -     | -     | 47.97 | 33.30  | 0.00  |
| <i>Limnothrix redekei</i> CACIAM25 NaNO <sub>3</sub> + / Light + | -          | 3.59  | 22.12 | 5.11  | 20.54 | 9.44  | 33.33 | -     | -     | 1.15  | 56.83 | 38.44  | 0.00  |
| <i>Limnothrix redekei</i> CACIAM25 NaNO <sub>3</sub> + / Light - | -          | -     | 39.83 | -     | 12.72 | 8.97  | 38.49 | -     | -     | -     | 61.51 | 38.49  | 0.00  |
| <i>Limnothrix redekei</i> CACIAM25 NaNO <sub>3</sub> - / Light + | -          | 10.62 | 43.29 | 20.93 | -     | 3.47  | -     | 13.05 | -     | -     | 57.38 | 20.93  | 13.05 |
| <i>Limnothrix redekei</i> CACIAM25 NaNO <sub>3</sub> - / Light - | -          | 1.62  | 33.14 | -     | 11.25 | 11.20 | 15.42 | -     | -     | 1.39  | 48.15 | 33.08  | 0.00  |
| <i>Limnothrix redekei</i> CACIAM25 NaNO <sub>3</sub> 0 / Light 0 | -          | -     | 23.39 | 3.43  | 29.45 | -     | 32.88 | -     | -     | -     | 52.84 | 36.31  | 0.00  |

+ = high level, - = low level, 0 = central level for the variables: NaNO<sub>3</sub> concentration and light intensity

SFA: saturated fatty acids, MUFA: monounsaturated fatty acids, PUFA: polyunsaturated fatty acids

**Table 3** Empirical parameters of biodiesel quality based on the fatty acid profile of cyanobacterial strains

| Strains                                             | DU   | SV<br>(mg/g) | IV   | CN    | LCSF | CFPP<br>(°C) | CP<br>(°C) | PP<br>(°C) | APE  | BAPE | HHV  | $\nu$<br>(mm <sup>2</sup> /s) | P<br>(g/cm <sup>3</sup> ) |
|-----------------------------------------------------|------|--------------|------|-------|------|--------------|------------|------------|------|------|------|-------------------------------|---------------------------|
| <sup>1</sup> CACIAM05 NaNO <sub>3</sub> + / Light + | 0.0  | 181.9        | 0.0  | 76.3  | 10.3 | 15.9         | 23.9       | 19.1       | 0.0  | 0.0  | 31.5 | 2.8                           | 0.7                       |
| CACIAM05 NaNO <sub>3</sub> + / Light -              | 44.8 | 159.0        | 40.5 | 71.5  | 3.0  | -7.1         | 10.7       | 4.8        | 42.7 | 0.0  | 30.3 | 2.9                           | 0.7                       |
| CACIAM05 NaNO <sub>3</sub> - / Light +              | 30.4 | 147.7        | 27.6 | 77.1  | 3.8  | -4.7         | 14.8       | 9.3        | 28.2 | 0.0  | 27.7 | 2.6                           | 0.6                       |
| CACIAM05 NaNO <sub>3</sub> - / Light -              | 22.6 | 131.9        | 20.5 | 83.1  | 3.8  | -4.6         | 14.9       | 9.3        | 20.6 | 0.0  | 24.5 | 2.3                           | 0.5                       |
| CACIAM05 NaNO <sub>3</sub> 0 / Light 0              | 35.2 | 172.5        | 34.6 | 70.1  | 7.4  | 6.7          | 26.8       | 22.3       | 35.2 | 20.6 | 31.7 | 2.9                           | 0.7                       |
| <sup>2</sup> CACIAM08 NaNO <sub>3</sub> + / Light + | 49.5 | 196.2        | 44.5 | 64.1  | 12.0 | 21.2         | 10.8       | 4.9        | 49.5 | 2.7  | 38.0 | 3.9                           | 0.8                       |
| CACIAM08 NaNO <sub>3</sub> + / Light -              | 43.9 | 201.9        | 39.5 | 64.5  | 2.6  | -8.4         | 8.5        | 2.4        | 43.9 | 0.0  | 38.7 | 4.0                           | 0.9                       |
| CACIAM08 NaNO <sub>3</sub> - / Light +              | 5.8  | 72.0         | 5.2  | 121.0 | 2.9  | -7.5         | -5.0       | -12.2      | 5.8  | 0.0  | 14.0 | 1.7                           | 0.3                       |
| CACIAM08 NaNO <sub>3</sub> - / Light -              | 15.4 | 154.9        | 13.9 | 78.4  | 10.3 | 15.9         | 12.4       | 6.7        | 15.4 | 2.8  | 29.2 | 2.9                           | 0.6                       |
| CACIAM08 NaNO <sub>3</sub> 0 / Light 0              | 29.9 | 177.9        | 26.9 | 70.9  | 5.1  | -0.5         | 11.4       | 5.6        | 29.9 | 0.0  | 33.8 | 3.3                           | 0.7                       |
| <sup>3</sup> CACIAM18 NaNO <sub>3</sub> + / Light + | 38.7 | 180.6        | 38.2 | 67.9  | 3.3  | -6.1         | 12.4       | 6.6        | 4.6  | 0.0  | 31.8 | 2.7                           | 0.7                       |
| CACIAM18 NaNO <sub>3</sub> + / Light -              | 52.6 | 195.0        | 52.5 | 62.5  | 2.5  | -8.6         | 8.3        | 2.2        | 0.0  | 0.0  | 34.1 | 2.8                           | 0.8                       |
| CACIAM18 NaNO <sub>3</sub> - / Light +              | 23.8 | 162.7        | 23.8 | 74.5  | 3.0  | -7.2         | 10.6       | 4.7        | 0.0  | 0.0  | 28.0 | 2.4                           | 0.6                       |
| CACIAM18 NaNO <sub>3</sub> - / Light -              | 43.0 | 207.4        | 42.9 | 63.0  | 4.5  | -2.4         | 12.2       | 6.5        | 0.0  | 0.0  | 36.2 | 3.1                           | 0.8                       |
| CACIAM18 NaNO <sub>3</sub> 0 / Light 0              | 33.3 | 181.2        | 32.5 | 69.1  | 3.0  | -7.1         | 10.7       | 4.8        | 7.8  | 0.0  | 31.7 | 2.7                           | 0.7                       |
| <sup>4</sup> CACIAM25 NaNO <sub>3</sub> + / Light + | 38.4 | 197.7        | 35.1 | 66.0  | 8.1  | 8.9          | 6.6        | 0.4        | 33.3 | 2.3  | 37.6 | 3.8                           | 0.8                       |
| CACIAM25 NaNO <sub>3</sub> + / Light -              | 38.5 | 207.3        | 34.6 | 64.9  | 8.5  | 10.1         | 16.0       | 10.5       | 38.5 | 0.0  | 39.5 | 4.1                           | 0.9                       |
| CACIAM25 NaNO <sub>3</sub> - / Light +              | 47.0 | 199.5        | 44.5 | 63.6  | 6.1  | 2.6          | 17.8       | 12.5       | 26.1 | 13.1 | 35.7 | 3.1                           | 0.8                       |
| CACIAM25 NaNO <sub>3</sub> - / Light -              | 33.1 | 167.7        | 30.1 | 72.1  | 6.3  | 3.4          | 6.8        | 0.5        | 30.0 | 0.0  | 32.1 | 3.2                           | 0.7                       |
| CACIAM25 NaNO <sub>3</sub> 0 / Light 0              | 36.3 | 184.8        | 33.0 | 68.4  | 2.3  | -9.1         | 7.3        | 1.1        | 32.9 | 0.0  | 35.2 | 3.5                           | 0.8                       |

<sup>1</sup>*Synechocystis* sp. CACIAM05, <sup>2</sup>*Microcystis aeruginosa* CACIAM08, <sup>3</sup>*Leptolyngbya* sp. CACIAM18, <sup>4</sup>*Limnithrix redekei* CACIAM25

**Table 5** Strain sources used in this study.

| Strain                                 | Local                                    |
|----------------------------------------|------------------------------------------|
| <i>Microcystis aeruginosa</i> CACIAM03 | Hydroelectric plant of Tucuruí reservoir |
| <i>Synechocystis</i> sp. CACIAM05      | Bologna Lake                             |
| <i>Lyngbya</i> sp. CACIAM07            | Hydroelectric plant of Tucuruí reservoir |
| <i>Microcystis aeruginosa</i> CACIAM08 | Hydroelectric plant of Tucuruí reservoir |
| <i>Synechococcus</i> sp. CACIAM66      | Hydroelectric plant of Tucuruí reservoir |
| <i>Leptolyngbya</i> sp. CACIAM18       | Bologna Lake                             |

|                                             |                                          |
|---------------------------------------------|------------------------------------------|
| <i>Limnothrix redekei</i> CACIAM25          | Hydroelectric plant of Tucuruí reservoir |
| <i>Planktothrix pseudoagardhii</i> CACIAM27 | Hydroelectric plant of Tucuruí reservoir |

**Table 6** Real and coded levels for the variables: luminous intensity and nitrogen levels (NaNO<sub>3</sub>) in the cultivation of cyanobacteria

| Variable                                               |        | Level |      |     |
|--------------------------------------------------------|--------|-------|------|-----|
| Independent variables                                  | Symbol | -1    | 0    | 1   |
| Light intensity ( $\mu\text{mol}/\text{m}^2\text{s}$ ) | X      | 15    | 57.5 | 100 |
| NaNO <sub>3</sub> (g/L)                                | Y      | 1     | 1.5  | 2.0 |
